# Supplementary material for: Semaphorin-3F/Neuropilin-2 Transcriptional Expression as a Predictive Biomarker of Occult Lymph Node Metastases in HNSCC
Source: MDPI journal article supplement (doi:10.3390/cancers14092259), 2022-04-30
Supplement: s1 [file s1]

## Supplementary material

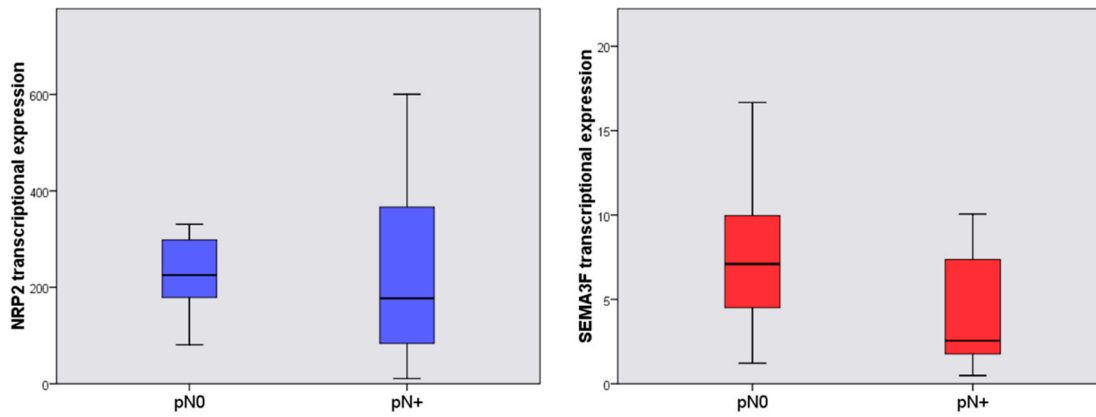

**Figure S1.** Distribution of the transcriptional expression values of NRP2 and SEMA3F according to the pathologic status of the neck.

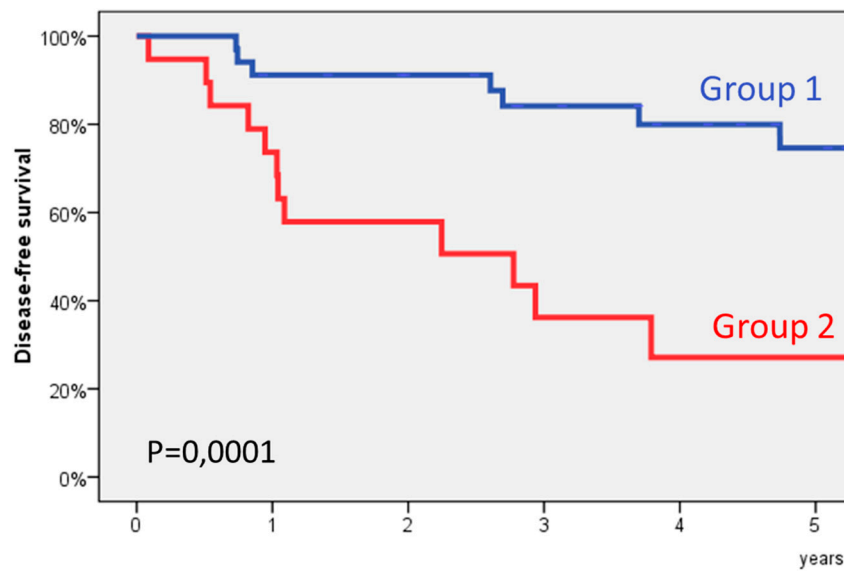

**Figure S2.** Disease-free survival according to the expression categories of the SEMA3F-NRP2 genes.

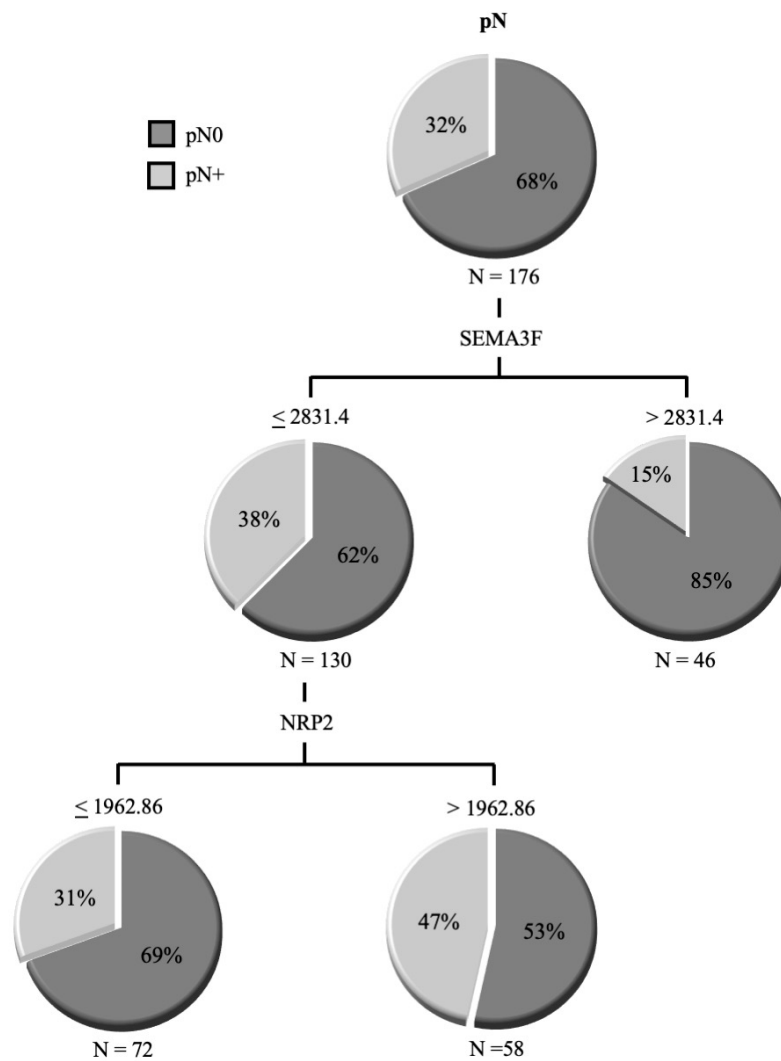

**Figure S3.** Classification tree according to the transcriptional expression values of SEMA3F and NRP2 of the patients included in The Cancer Genome Atlas considering the presence of occult lymph node metastases as the dependent variable.

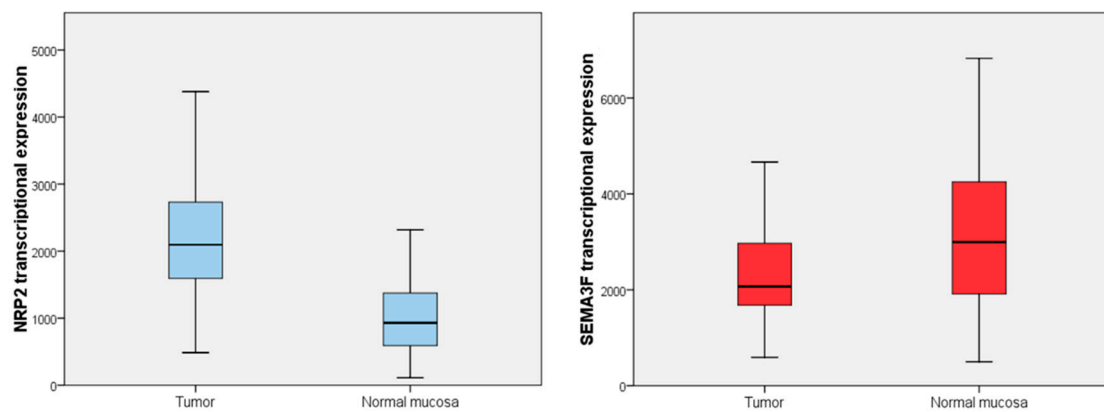

**Figure S4.** Distribution of the transcriptional expression values of NRP2 and SEMA3F in the samples of the healthy mucosa and the tumor of the patients included The Cancer Genome Atlas.

**Table S1.** Characteristics of the patients of The Cancer Genome Atlas included in the validation study.

|                                 |             | N (%)       |
|---------------------------------|-------------|-------------|
| <b>Mean age (SD) years</b>      |             | 63.1 (12.0) |
| <b>Gender</b>                   | Male        | 128 (72.7%) |
|                                 | Female      | 48 (27.3%)  |
| <b>Location</b>                 | Oral cavity | 123 (69.9%) |
|                                 | Oropharynx  | 11(6.3%)    |
|                                 | Hypopharynx | 1 (0.6%)    |
|                                 | Larynx      | 41 (23.3%)  |
| <b>Clinical local extension</b> | cT1         | 16 (9.1%)   |
|                                 | cT2         | 55 (31.3%)  |
|                                 | cT3         | 45 (25.6%)  |
|                                 | cT4         | 60 (34.1%)  |

**Table S2.** Median of the transcriptional expression values of SEMA3F and NRP2 according to the characteristics of the patients included in the study.

|                           |                           | SEMA3F | <i>p</i> | NRP2  | <i>p</i> |
|---------------------------|---------------------------|--------|----------|-------|----------|
| <b>Location</b>           | Oral cavity               | 4.51   | 0.394    | 233.8 | 0.449    |
|                           | Hypopharynx               | 7.60   |          | 309.5 |          |
|                           | Larynx                    | 5.57   |          | 202.8 |          |
| <b>Toxic consumption</b>  | No                        | 3.78   | 0.770    | 218.8 | 0.284    |
|                           | Moderate                  | 5.32   |          | 270.5 |          |
|                           | Severe                    | 5.85   |          | 200.9 |          |
| <b>Local extension</b>    | cT1-2                     | 4.63   | 0.794    | 350.6 | 0.255    |
|                           | cT3                       | 6.47   |          | 248.6 |          |
|                           | cT4                       | 5.61   |          | 202.8 |          |
| <b>Regional extension</b> | pN0                       | 7.09   | 0.006    | 225.2 | 0.545    |
|                           | pN+                       | 2.55   |          | 177.0 |          |
| <b>Histologic grade</b>   | Well differentiated       | 4.51   | 0.647    | 270.5 | 0.921    |
|                           | Moderately differentiated | 5.85   |          | 213.0 |          |
|                           | Poorly differentiated     | 5.02   |          | 225.2 |          |
